# Supplementary figures and images for: Prebiotic, Probiotic, and Synbiotic Consumption Alter Behavioral Variables and Intestinal Permeability and Microbiota in BTBR Mice
Source: MDPI journal article supplement (doi:10.3390/microorganisms9091833), 2021-08-29

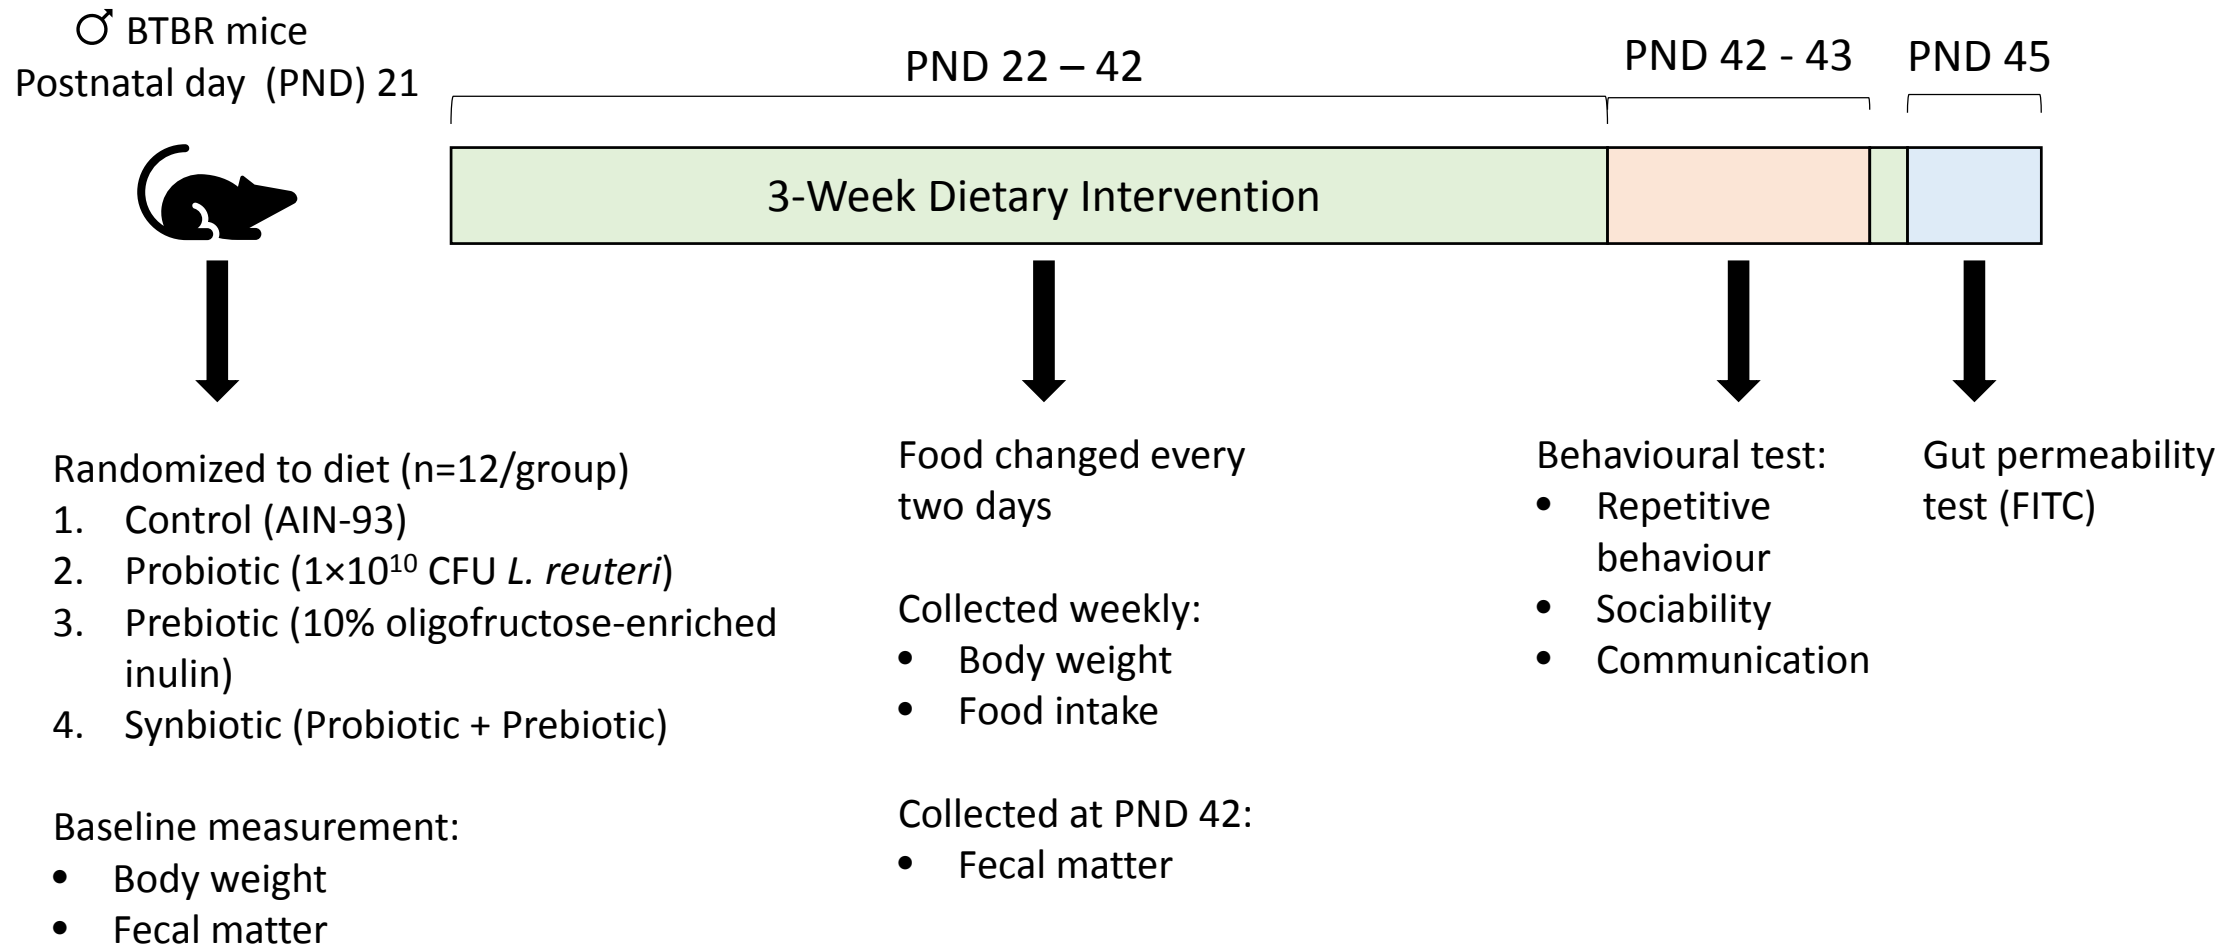

**Figure S1. Schematic of the study design.**

Supplement: s1 [file s1]
